# Supplementary figures and images for: Developmentally regulated multisensory integration for prey localization in the medicinal leech
Source: Oxford University Press journal article supplement (doi:10.1242/jeb.059618), 2011-10-26

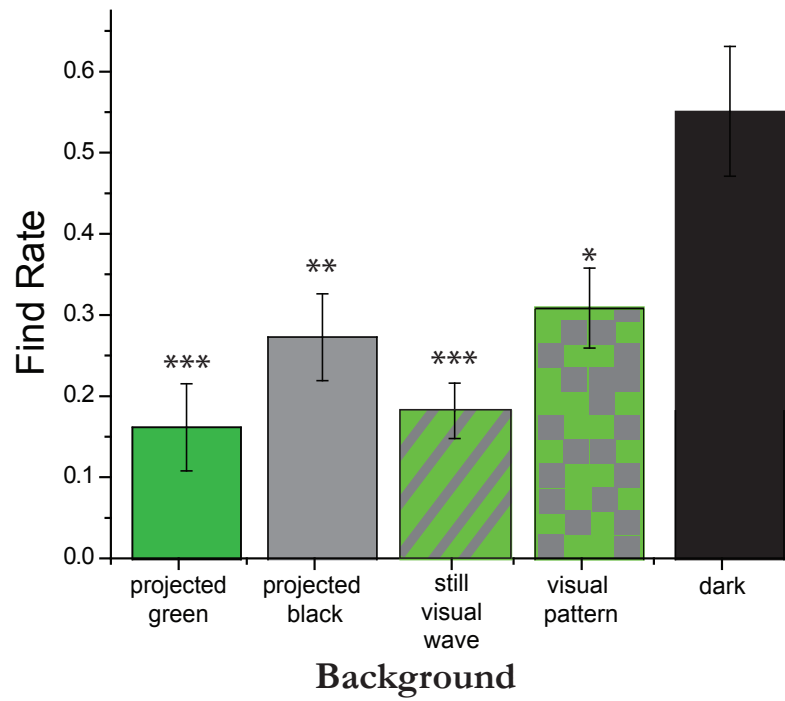

Supplement: jeb059618figs1.pdf [file jeb059618figs1.pdf]
